# Supplementary material for: Effect of molecular weight of additives on the conductivity of PEDOT:PSS and efficiency for ITO-free organic solar cells
Source: Royal Society of Chemistry journal article supplement (doi:10.1039/c3ta11726j), 2013-01-01
Supplement: c3ta11726j.pdf [file c3ta11726j.pdf]

## Supplementary Information

### Effect of Molecular Weight of Additives on the Conductivity of PEDOT:PSS and Efficiency for ITO-free Organic Solar Cells

Desalegn Alemu,<sup>a,b,c</sup> Pen-Cheng Wang<sup>c</sup> and Chih-Wei Chu<sup>\*b,d</sup>

<sup>a</sup>Nanoscience and Technology Program, Taiwan International Graduate Program, Academia Sinica, Taipei 115, Taiwan

<sup>b</sup>Research Center for Applied Sciences, Academia Sinica, Taipei 115, Taiwan, Fax: 886-2-27896680 Tel: 886-2-27898000 ext 70 E-mail: [gchu@gate.sinica.edu.tw](mailto:gchu@gate.sinica.edu.tw)

<sup>c</sup>Department of Engineering and Systems Science, National Tsing Hua University, Hsinchu 30013, Taiwan

<sup>d</sup>Department of Photonics, National Chiao Tung University, Hsinchu 300, Taiwan

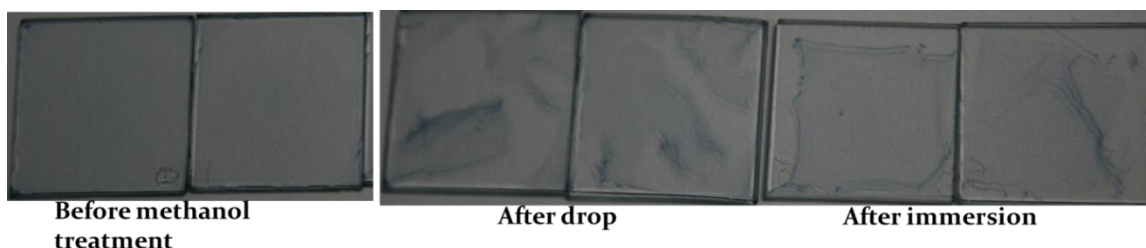

**Fig. S1** PEDOT:PSS film prepared using 2% PEG400 additive before and after film treatment with methanol by dropping methanol on the film or immersing the film in methanol after annealing

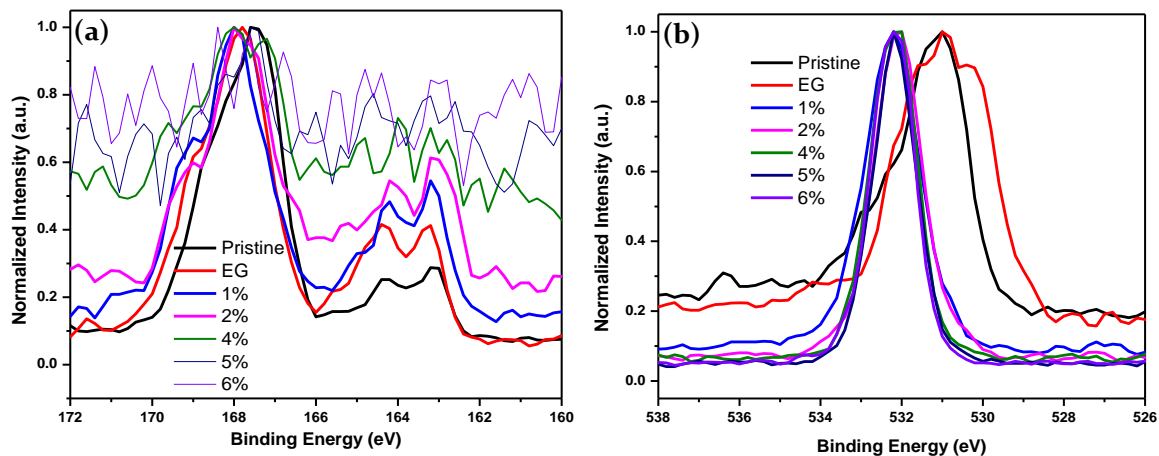

**Fig. S2** XPS spectra of pristine PEDOT:PSS and PEDOT:PSS films treated with 6% EG and different concentration PEG400. (The numbers indicate the concentration of PEG400) (a) S(2p), (b) O(1s) core-level spectra.

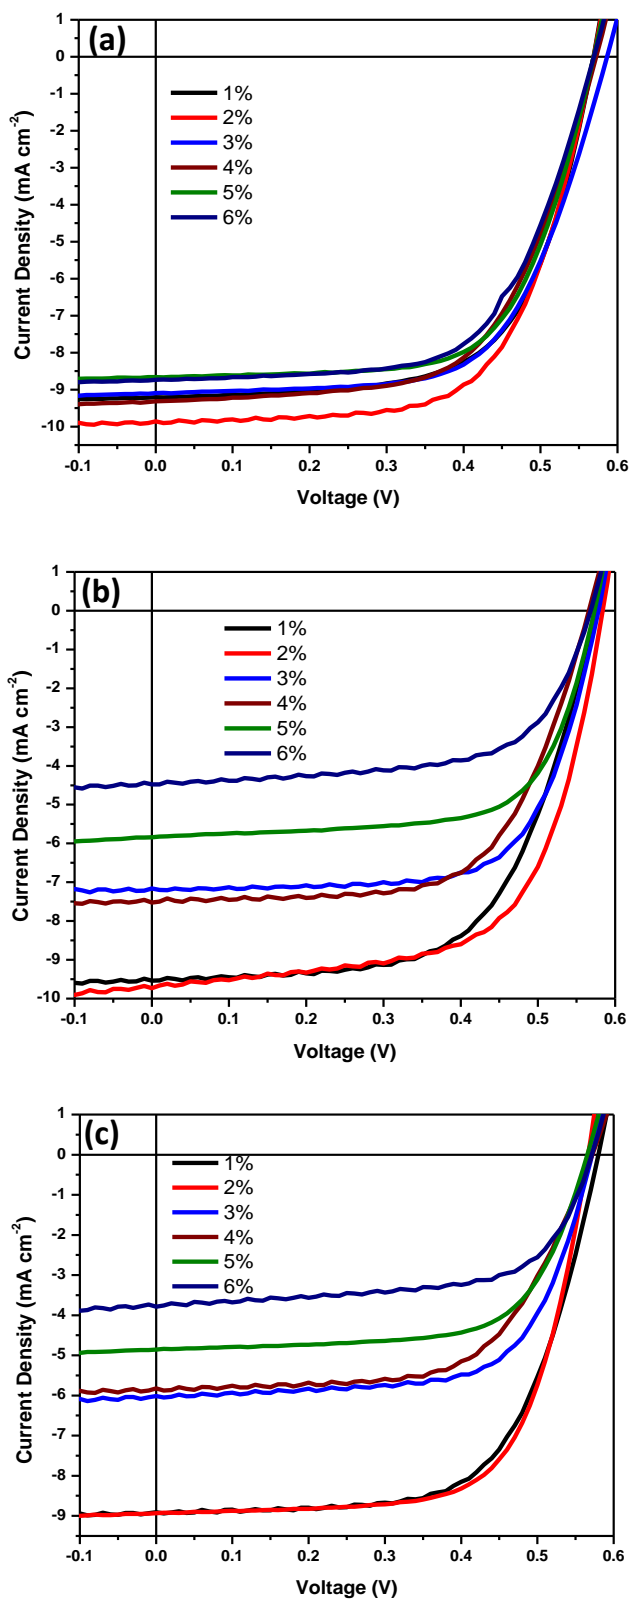

Fig. S3 *J-V* curves of OSCs with PEDOT:PSS anodes treated using different concentration PEG: (a) PEG200, (b) PEG300 and (c) PEG400.

**Table S1** Photovoltaic performances of OSC devices with PEDOT:PSS treated with different concentration PEG200 extracted from Fig. S3a.

| PEG Conc. | $J_{SC}$ (mA $cm^{-2}$ ) | $V_{OC}$ (V) | FF (%) | PCE (%) |
|-----------|--------------------------|--------------|--------|---------|
| 1         | 9.21                     | 0.58         | 63.84  | 3.41    |
| 2         | 9.86                     | 0.58         | 63.13  | 3.61    |
| 3         | 9.1                      | 0.59         | 62.95  | 3.38    |
| 4         | 9.32                     | 0.58         | 61.55  | 3.27    |
| 5         | 8.66                     | 0.58         | 64.70  | 3.25    |
| 6         | 8.73                     | 0.58         | 61.62  | 3.12    |

**Table S2** Photovoltaic performances of OSC devices with PEDOT:PSS treated with different concentration PEG300 extracted from Fig. S3b.

| PEG Conc. | $J_{SC}$ (mA $cm^{-2}$ ) | $V_{OC}$ (V) | FF (%) | PCE (%) |
|-----------|--------------------------|--------------|--------|---------|
| 1         | 9.54                     | 0.58         | 61.09  | 3.38    |
| 2         | 9.73                     | 0.58         | 63.44  | 3.58    |
| 3         | 7.16                     | 0.58         | 68.87  | 2.86    |
| 4         | 7.52                     | 0.58         | 62.36  | 2.72    |
| 5         | 5.84                     | 0.58         | 67.02  | 2.27    |
| 6         | 4.48                     | 0.57         | 63.44  | 1.62    |

**Table S3** Photovoltaic performances of OSC devices with PEDOT:PSS treated with different concentration PEG400 extracted from Fig. S3c.

| PEG Conc. | $J_{SC}$ (mA $cm^{-2}$ ) | $V_{OC}$ (V) | FF (%) | PCE (%) |
|-----------|--------------------------|--------------|--------|---------|
| 1         | 8.91                     | 0.58         | 64.44  | 3.33    |
| 2         | 8.93                     | 0.58         | 66.42  | 3.44    |
| 3         | 6.01                     | 0.58         | 65.98  | 2.30    |
| 4         | 5.82                     | 0.58         | 61.91  | 2.09    |
| 5         | 4.83                     | 0.58         | 65.68  | 1.84    |
| 6         | 3.79                     | 0.57         | 63.42  | 1.37    |
